# Supplementary material for: Association of CETP Gene Polymorphisms and Haplotypes with Cardiovascular Risk
Source: MDPI journal article supplement (doi:10.3390/ijms241210281), 2023-06-17
Supplement: s1 [file s1]

**Supplementary Table S1.** Association of SNPs in the *CETP* gene with triacylglycerol (TG), high-density lipoprotein cholesterol (HDL-C) levels and HDL subfractions (in mmol/L).

|             | rs1532624 – C allele                         | rs708272 – G allele                          | rs7499892 – T allele                      |
|-------------|----------------------------------------------|----------------------------------------------|-------------------------------------------|
|             | $\beta$ (95% CI)                             |                                              |                                           |
| TG          | N.S.                                         | N.S.                                         | 0.176 (0.020 – 0.332)<br>$p = 0.027^*$    |
| HDL-C       | -0.072 (-0.115 – -0.029)<br>$p = 0.001^{**}$ | -0.068 (-0.110 – -0.026)<br>$p = 0.002^{**}$ | -0.056 (-0.107 – -0.005)<br>$p = 0.033^*$ |
| HDL-1       | -0.006 (-0.011 – 0.001)<br>$p = 0.025^*$     | -0.005 (-0.010 – -0.001)<br>$p = 0.029^*$    | -0.007 (-0.13 – -0.001)<br>$p = 0.031^*$  |
| HDL-2       | -0.010 (-0.018 – -0.002)<br>$p = 0.014^*$    | -0.009 (-0.017 – -0.001)<br>$p = 0.024^*$    | N.S.                                      |
| HDL-3       | -0.010 (-0.019 – -0.002)<br>$p = 0.017^*$    | -0.009 (-0.017 – -0.001)<br>$p = 0.035^*$    | N.S.                                      |
| HDL-4       | -0.010 (-0.017 – -0.002)<br>$p = 0.012^*$    | -0.009 (-0.016 – -0.001)<br>$p = 0.022^*$    | N.S.                                      |
| HDL-5       | -0.008 (-0.013 – -0.003)<br>$p < 0.001^{**}$ | -0.008 (-0.012 – -0.003)<br>$p = 0.001^{**}$ | N.S.                                      |
| HDL-6       | -0.011 (-0.019 – -0.003)<br>$p = 0.007^*$    | -0.011 (-0.019 – -0.004)<br>$p = 0.005^{**}$ | -0.011 (-0.021 – -0.001)<br>$p = 0.027^*$ |
| HDL-7       | -0.004 (-0.007 – 0.000)<br>$p = 0.042^*$     | -0.004 (-0.007 – -0.001)<br>$p = 0.024^*$    | -0.004 (-0.008 – 0.000)<br>$p = 0.041^*$  |
| HDL-8       | N.S.                                         | -0.003 (-0.006 – 0.000)<br>$p = 0.044^*$     | -0.004 (-0.007 – 0.000)<br>$p = 0.037^*$  |
| HDL-9       | N.S.                                         | N.S.                                         | N.S.                                      |
| HDL-10      | N.S.                                         | N.S.                                         | N.S.                                      |
| Large HDL   | -0.026 (-0.046 – -0.006)<br>$p = 0.009^*$    | -0.023 (-0.043 – -0.004)<br>$p = 0.019^*$    | -0.024 (-0.047 – 0.000)<br>$p = 0.050^*$  |
| Interm. HDL | -0.034 (-0.055 – -0.012)<br>$p = 0.002^{**}$ | -0.033 (-0.054 – -0.012)<br>$p = 0.002^{**}$ | -0.027 (-0.052 – -0.002)<br>$p = 0.036^*$ |
| Small HDL   | N.S.                                         | N.S.                                         | N.S.                                      |

N.S.: non-significant; Interm.: intermediate; \*:  $p < 0.05$  (conventional  $p$ -value); \*\*:  $p < 0.005$  (Bonferroni corrected  $p$ -value)
