# Supplementary material for: Association of CETP Gene Polymorphisms and Haplotypes with Cardiovascular Risk
Source: MDPI journal article supplement (doi:10.3390/ijms241210281), 2023-06-17
Supplement: s1 [file s1]

**Supplementary Table S2.** The results of linkage disequilibrium analyses for the five SNPs (rs1532624, rs5882, rs7082272, rs7499892, and rs9989419), as it is, showed by using the LDlink online tool on the Genome Reference Consortium Human Build 38 (GRCh38) database.

|           | rs9989419 | rs7082272 | rs1532624 | rs7499892 |
|-----------|-----------|-----------|-----------|-----------|
| rs7082272 | D': 0.486 |           |           |           |
| rs1532624 | D': 0.620 | D': 0.812 |           |           |
| rs7499892 | D': 0.462 | D': 0.779 | D': 0.995 |           |
| rs5882    | D': 0.091 | D': 0.291 | D': 0.341 | D': 0.343 |
